# Supplementary material for: Simple predictive models identify patients with COVID-19 pneumonia and poor prognosis
Source: PubMed Central journal article supplement (PMC7769554; doi:10.1371/journal.pone.0244627), 2020-12-28
Supplement: pone.0244627.s003.pdf [file pone.0244627.s003.pdf]

**S1 Table.** Treatment and clinical endpoints according to the high-flow oxygen support (invasive or non-invasive ventilation, nasal high-flow cannula or non-rebreathing oxygen mask with reservoir).

|                                                        | Overall<br>(N=430) | High-flow oxygen support |             | p value |
|--------------------------------------------------------|--------------------|--------------------------|-------------|---------|
|                                                        |                    | Yes (N=135)              | No (N=295)  |         |
| <b>Antiviral treatment</b>                             |                    |                          |             |         |
| None                                                   | 38 (8.8%)          | 11 (8.1%)                | 27 (9.2%)   | 0.961   |
| Lopinavir/R (LPV/R)                                    | 3 (0.7%)           | 1 (0.7%)                 | 2 (0.7%)    |         |
| Hydroxychloroquine (HCQ)                               | 96 (22.3%)         | 32 (23.7%)               | 64 (21.7%)  |         |
| LPV/R + HCQ                                            | 293 (68.1%)        | 91 (67.4%)               | 202 (68.5%) |         |
| <b>Tocilizumab</b>                                     | 120 (27.9%)        | 84 (62.2%)               | 36 (12.2%)  | <0.001  |
| <b>Pulses of corticoids*</b>                           | 53 (12.3%)         | 38 (28.1%)               | 15 (5.1%)   | <0.001  |
| <b>Days from admission to high-flow oxygen support</b> | 2.3±3.2            | 3.4±3.4                  | ---         | ---     |
| <b>Days of hospitalization</b>                         | 12.2±10.4          | 25.3±13.2                | 8.0±3.8     | <0.001  |
| <b>Overall mortality rate</b>                          | 34 (7.9%)          | 30 (22.2%)               | 4 (1.4%)    | <0.001  |
| <b>Mortality rate due to covid-19</b>                  | 24 (5.6%)          | 21 (15.6%)               | 3 (1%)      | <0.001  |
| <b>Readmission related to covid-19 complications</b>   | 15 (3.5%)          | 3 (3.1%)                 | 12 (4.3%)   | 0.428   |

\*Defined as  $\geq 1$  mg/Kg/d for at least 3 days.
