# Supplementary material for: Simple predictive models identify patients with COVID-19 pneumonia and poor prognosis
Source: PubMed Central journal article supplement (PMC7769554; doi:10.1371/journal.pone.0244627), 2020-12-28
Supplement: pone.0244627.s004.pdf [file pone.0244627.s004.pdf]

**S2 Table.** Univariate and multivariate analysis of factors associated with mortality rate related to SARS CoV-2

|                                                   | Univariate analysis | Multivariate analysis |         |
|---------------------------------------------------|---------------------|-----------------------|---------|
|                                                   | p value             | 95% CI                | p value |
| <b>Male sex</b>                                   | 0.022               | --                    | 0.190   |
| <b>Age, years</b>                                 | <0.001              | --                    | 0.164   |
| <b>Arterial Hypertension</b>                      | <0.001              | 4.485 (1.725-11.661)  | 0.002   |
| <b>Diabetes mellitus</b>                          | 0.076               | --                    | 0.533   |
| <b>Obesity</b>                                    | 0.430               | --                    | --      |
| <b>Chronic obstructive pulmonary disease</b>      | 0.001               | --                    | 0.776   |
| <b>Asthma</b>                                     | 0.265               | --                    | --      |
| <b>Smoker (active or former)</b>                  | <0.001              | --                    | 0.088   |
| <b>Immunosuppressive therapy</b>                  | 0.607               | --                    | --      |
| <b>X-ray (peripheral infiltrate as reference)</b> |                     |                       |         |
| Unilateral pneumonia                              | 0.064               | --                    | 0.539   |
| Bilateral pneumonia                               |                     |                       |         |
| <b>SpO2/FiO2</b>                                  | <0.001              | 0.996 (0.993-0.999)   | 0.012   |
| <b>Fever</b>                                      | 0.200               | --                    | --      |
| <b>Cough</b>                                      | 0.022               | --                    | 0.441   |
| <b>Dyspnea</b>                                    | 0.403               | --                    | --      |
| <b>Diarrhea</b>                                   | 0.026               | --                    | 0.271   |
| <b>Myalgia</b>                                    | 0.051               | --                    | 0.278   |
| <b>Hemoglobin, mg/dL</b>                          | 0.011               | --                    | 0.173   |
| <b>Neutrophils/ Lymphocyte ratio</b>              | 0.042               | --                    | 0.325   |
| <b>Platelets, x10E9/L</b>                         | 0.105               | --                    | --      |
| <b>Ferritin, ng/mL</b>                            | 0.208               | --                    | --      |
| <b>C reactive protein, mg/dL</b>                  | 0.003               | --                    | 0.985   |
| <b>LDH, IU/mL</b>                                 | 0.196               | --                    | --      |
| <b>ALT, IU/mL</b>                                 | 0.076               | --                    | 0.132   |
| <b>Conjugated bilirubin, mg/dL</b>                | 0.071               | --                    | 0.755   |
| <b>Urea, mg/dL</b>                                | <0.001              | --                    | 0.364   |
| <b>IL-6, pg/mL</b>                                | 0.792               | --                    | --      |
| <b>Antiviral therapy (none as reference)</b>      |                     |                       |         |
| HCQ                                               | 0.077               | --                    | 0.153   |
| HCQ + LPV/R                                       |                     |                       |         |
