# Supplementary material for: Simple predictive models identify patients with COVID-19 pneumonia and poor prognosis
Source: PubMed Central journal article supplement (PMC7769554; doi:10.1371/journal.pone.0244627), 2020-12-28
Supplement: pone.0244627.s005.pdf [file pone.0244627.s005.pdf]

**S3 Table:** Number of patients with need of oxygen supplementation at admission to the ER department and the mean SpO<sub>2</sub>/FiO<sub>2</sub> according to the baseline chest X-ray findings.

|                                                          |             | Chest X-ray (N=430)           |                             |                             | p value |
|----------------------------------------------------------|-------------|-------------------------------|-----------------------------|-----------------------------|---------|
|                                                          |             | Peripheral infiltrate (N=198) | Unilateral pneumonia (N=77) | Bilateral pneumonia (N=232) |         |
| Baseline oxygen support to achieve SpO <sub>2</sub> >95% | None (0.21) | 152 (76.8%)                   | 62 (80.5%)                  | 83 (53.5%)                  | <0.001  |
|                                                          | 0.24-0.34   | 36 (18.2%)                    | 13 (16.9%)                  | 30 (19.4%)                  |         |
|                                                          | ≥0.35       | 10 (5.1%)                     | 2 (2.6%)                    | 42 (27.1%)                  |         |
| Mean SpO <sub>2</sub> /FiO <sub>2</sub> (SpFi)           |             | 424±75                        | 438±54                      | 347±139                     | <0.001  |
